# Supplementary figures and images for: Evaluation of statistical methods for normalization and differential expression in mRNA-Seq experiments
Source: Springer Nature journal article supplement (doi:10.1186/1471-2105-11-94), 2010-02-18

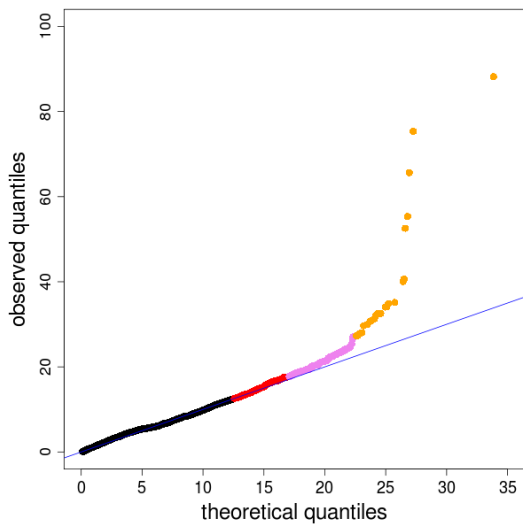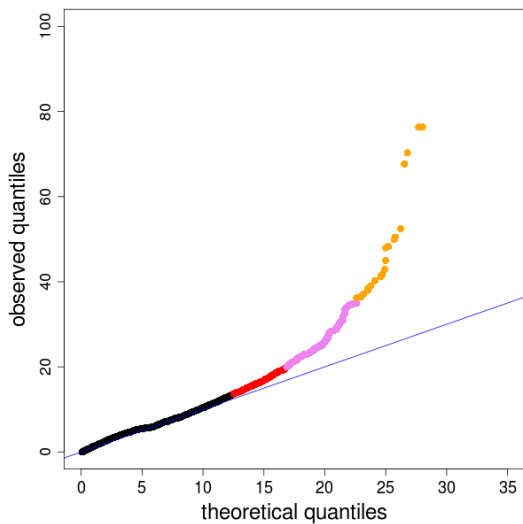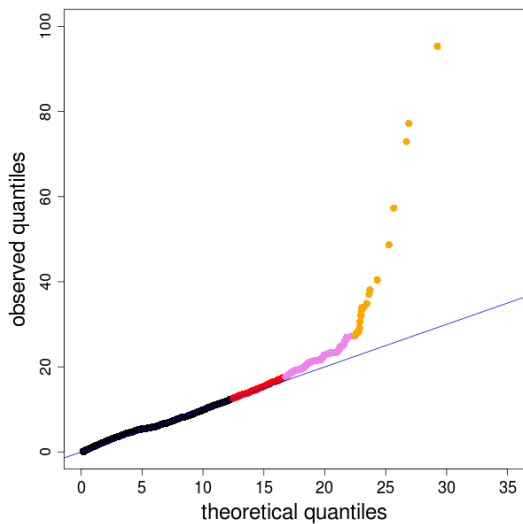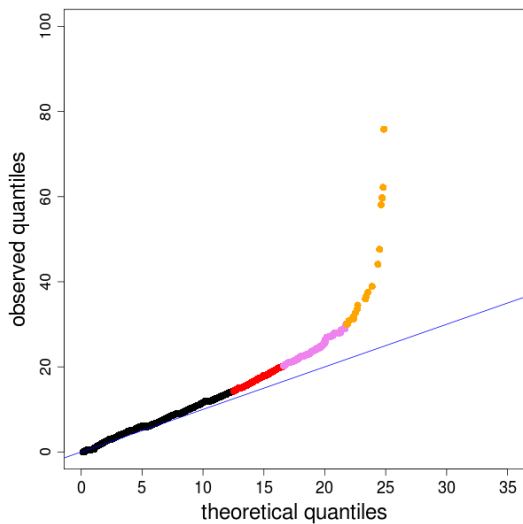

Supplement: 12859_2009_3551_MOESM10_ESM.pdf [file 12859_2009_3551_MOESM10_ESM.pdf]

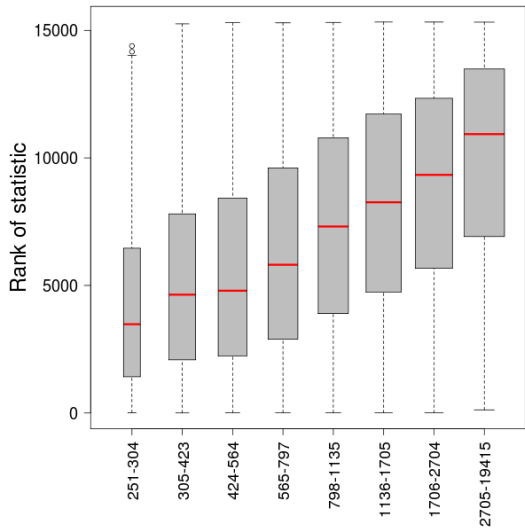

(a)  $t$ -statistics

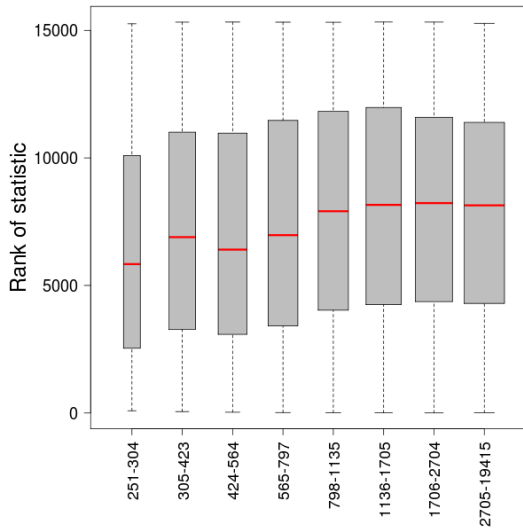

(b) Length-weighted  $t$ -statistics

Supplement: 12859_2009_3551_MOESM4_ESM.pdf [file 12859_2009_3551_MOESM4_ESM.pdf]

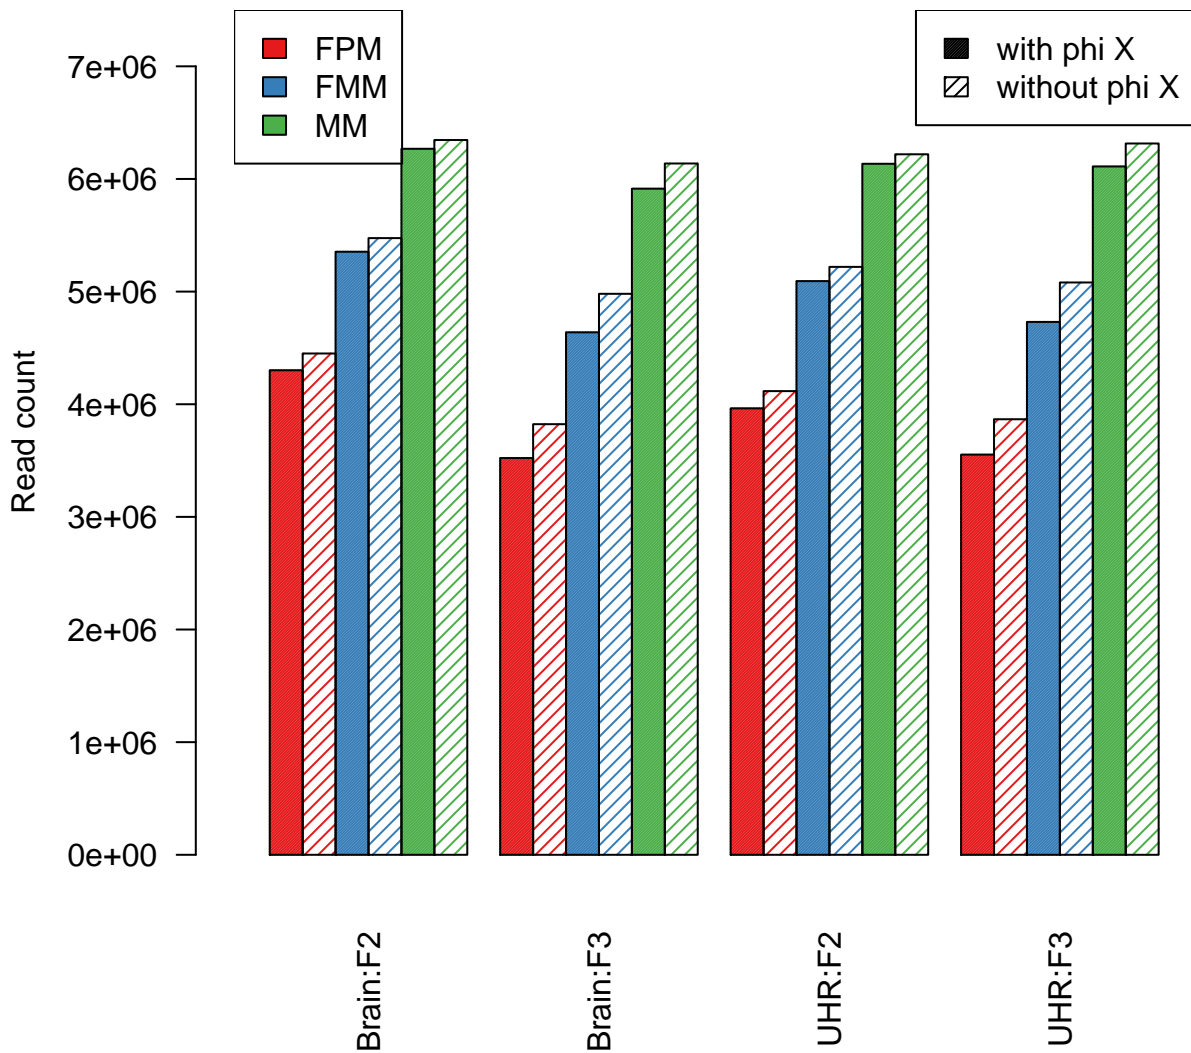

Supplement: 12859_2009_3551_MOESM5_ESM.pdf [file 12859_2009_3551_MOESM5_ESM.pdf]

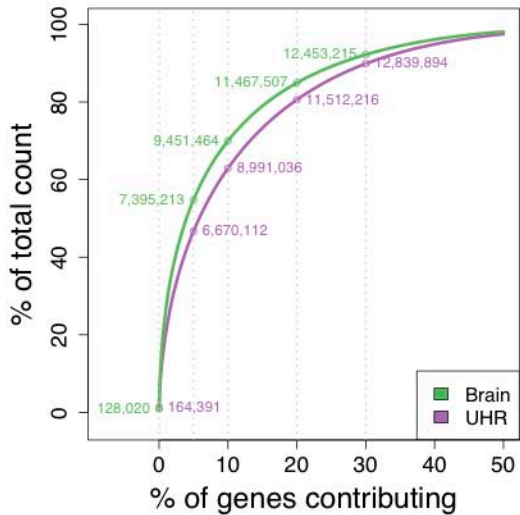

(a)

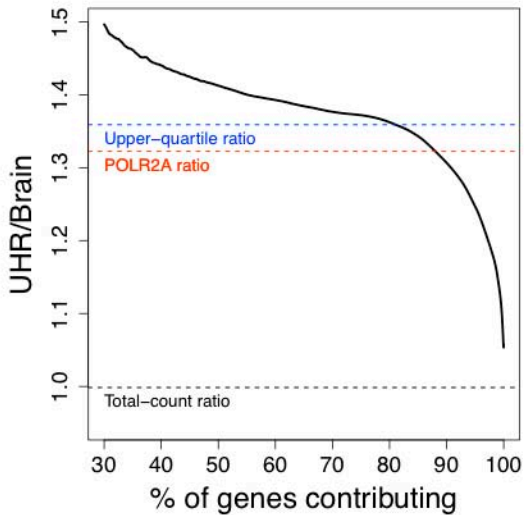

(b)

Supplement: 12859_2009_3551_MOESM7_ESM.pdf [file 12859_2009_3551_MOESM7_ESM.pdf]
